# Supplementary material
Source: publisher site journal article supplement (http://study.sagepub.com/sites/default/files/Appendix%20D.pdf)
Supplement: Supplementary file 1 [file Appendix%20D.pdf]

301 Moved Permanently


# 301 Moved Permanently


---

nginx
