# Supplementary material
Source: publisher site journal article supplement (http://study.sagepub.com/sites/default/files/Appendix%20D.pdf)
Supplement: Supplementary file 2 [file Appendix%20D.pdf]

# Appendix D

## Additional Information

---

### This section contains:

1. Determining Percentage Change in Evaluation
  2. Sample Size Determination Using Krejcie and Morgan Table
  3. Program Design and Evaluation Case Study
  4. Government Requirements of GPRA
  5. Human Subjects Review Code of Regulations
  6. Sample Photographic Release
  7. Line-Item Budget Worksheet
- 

### 1. Determining Percentage Change in Evaluation

The easiest type of indicator measure is knowledge change because you can give a pretest before the intervention to determine the amount of knowledge a person currently has, and then give a post-test to determine the amount of knowledge the person has at the end of the service. In other words, you measure the knowledge of the individual at the start and again at the end. Hopefully, the person had a higher score (knew more) at the end than they did at the start of the service or program!

Here is a simple formula to determine percentage of change: (1) subtract the starting value from the ending value, (2) divide that number by the starting number, and (3) multiply by 100 to convert that rate to a percentage. Example: A student scored 82 points on the pretest and 92 points on the post-test.  $92 - 82 = 10$ .  $10 / 82 = 0.1219 \times 100 = 12.19\%$  or simply 12%.)

## 2. Sample Size Determination Using Krejcie and Morgan Table

Small-Sample Techniques (1960). *The NEA Research Bulletin*, Vol. 38.

| <i>N</i> | <i>S</i> | <i>N</i> | <i>S</i> | <i>N</i> | <i>S</i> |
|----------|----------|----------|----------|----------|----------|
| 10       | 10       | 220      | 140      | 1200     | 291      |
| 15       | 14       | 230      | 144      | 1300     | 297      |
| 20       | 19       | 240      | 148      | 1400     | 302      |
| 25       | 24       | 250      | 152      | 1500     | 306      |
| 30       | 28       | 260      | 155      | 1600     | 310      |
| 35       | 32       | 270      | 159      | 1700     | 313      |
| 40       | 36       | 280      | 162      | 1800     | 317      |
| 45       | 40       | 290      | 165      | 1900     | 320      |
| 50       | 44       | 300      | 169      | 2000     | 322      |
| 55       | 48       | 320      | 175      | 2200     | 327      |
| 60       | 52       | 340      | 181      | 2400     | 331      |
| 65       | 56       | 360      | 186      | 2600     | 335      |
| 70       | 59       | 380      | 191      | 2800     | 338      |
| 75       | 63       | 400      | 196      | 3000     | 341      |
| 80       | 66       | 420      | 201      | 3500     | 346      |
| 85       | 70       | 440      | 205      | 4000     | 351      |
| 90       | 73       | 460      | 210      | 4500     | 354      |
| 95       | 76       | 480      | 214      | 5000     | 357      |
| 100      | 80       | 500      | 217      | 6000     | 361      |
| 110      | 86       | 550      | 226      | 7000     | 364      |
| 120      | 92       | 600      | 234      | 8000     | 367      |
| 130      | 97       | 650      | 242      | 9000     | 368      |
| 140      | 103      | 700      | 248      | 10000    | 370      |
| 150      | 108      | 750      | 254      | 15000    | 375      |
| 160      | 113      | 800      | 260      | 20000    | 377      |
| 170      | 118      | 850      | 265      | 30000    | 379      |
| 180      | 123      | 900      | 269      | 40000    | 380      |
| 190      | 127      | 950      | 274      | 50000    | 381      |
| 200      | 132      | 1000     | 278      | 75000    | 382      |
| 210      | 136      | 1100     | 285      | 100000   | 384      |

Note: *N* is population size. *S* is sample size.

### References

- Krejcie, R. V., & Morgan, D. W. (1970). Determining sample size for research activities. *Educational and Psychological Measurement*, 30(3), 607–610.  
 (Found on the KENPRO web site [www.kenpro.org](http://www.kenpro.org) which addresses issues of project management.)

### 3. Program Design and Evaluation Case Study

So that you might see how an evaluation plan becomes integrated into the program plan, let's begin with a hypothetical discussion: Let's say that my overall program goal is to prevent unintended adolescent pregnancy. I want to design a teen pregnancy prevention program for young adolescents. I am aware of the fact that this is a developmental period in which peers have a significant influence upon each other. As I read the professional literature, I find that social learning theory is one way to understand peer pressure and social norms. I select a curriculum for my program that is developed on the principles of social learning theory and I design my program to include traditional classroom instruction, a teen theater component, (the peer-to-peer aspect of social learning theory), a parent education component to improve parent and child communication, and a community advocacy component to address social norms promulgated through advertising and the media (again, a component of social learning theory). (Each of these program components will be written as measurable objectives.)

Then, as I am reading the program evaluation literature, I find the types of activities that have been used in the past in such programs, and their success in reaching their goals. Suppose that I learn that the classroom educational component is more effective when provided by college-age adults as compared to teens or older adults, and, consequently, I choose to design my educational intervention using college-age students. In this case, I can be said to be following *best practices* in that I am combining a sound theoretical orientation with a proven service delivery plan. I am now most likely to succeed.

### 4. Government Requirements of GPRA

The following description itemizes what the agency needs to provide to the federal government to comply with the Government Performance Results Act of 1993 from the OMB. The website at [Whitehouse.gov](http://Whitehouse.gov) states:

#### Sec. 306. Strategic plans

- (a) No later than September 30, 1997, the head of each agency shall submit to the Director of the Office of Management and Budget and to the Congress a strategic plan for program activities. Such plan shall contain—“(1) a *comprehensive mission statement covering the major functions and operations of the agency;*
- (2) *general goals and objectives, including outcome-related goals and objectives, for the major functions and operations of the agency;*
- (3) *a description of how the goals and objectives are to be achieved, including a description of the operational processes, skills and technology, and the*

*human, capital, information, and other resources required to meet those goals and objectives;*

*(4) a description of how the performance goals included in the plan required by section 1115(a) of title 31 shall be related to the general goals and objectives in the strategic plan;*

*(5) an identification of those key factors external to the agency and beyond its control that could significantly affect the achievement of the general goals and objectives; and*

*(6) a description of the program evaluations used in establishing or revising general goals and objectives, with a schedule for future program evaluations.*

(b) The strategic plan shall cover a period of not less than five years forward from the fiscal year in which it is submitted, and shall be updated and revised at least every three years.

## 5. Human Subjects Review Code of Regulations

From HHS.gov

### Code of Federal Regulations Title 45 Public Welfare

#### **Section 46.101** To what does this policy apply?

(a) Except as provided in paragraph (b) of this section, this policy applies to all research involving human subjects conducted, supported, or otherwise subject to regulation by any federal department or agency which takes appropriate administrative action to make the policy applicable to such research. This includes research conducted by federal civilian employees or military personnel, except that each department or agency head may adopt such procedural modifications as may be appropriate from an administrative standpoint. It also includes research conducted, supported, or otherwise subject to regulation by the federal government outside the United States.

(1) Research that is conducted or supported by a federal department or agency, whether or not it is regulated as defined in §46.102, must comply with all sections of this policy.

(2) Research that is neither conducted nor supported by a federal department or agency but is subject to regulation as defined in §46.102(e) must be reviewed and approved, in compliance with §46.101, §46.102, and §46.107 through §46.117 of this policy, by an institutional review board (IRB) that operates in accordance with the pertinent requirements of this policy.

(b) Unless otherwise required by department or agency heads, research activities in which the only involvement of human subjects will be in one or more of the following categories are exempt from this policy:

(1) Research conducted in established or commonly accepted educational settings, involving normal educational practices, such as (i) research on

regular and special education instructional strategies, or (ii) research on the effectiveness of or the comparison among instructional techniques, curricula, or classroom management methods.

- (2) Research involving the use of educational tests (cognitive, diagnostic, aptitude, achievement), survey procedures, interview procedures, or observation of public behavior, unless:
    - (i) information obtained is recorded in such a manner that human subjects can be identified, directly or through identifiers linked to the subjects; and (ii) any disclosure of the human subjects' responses outside the research could reasonably place the subjects at risk of criminal or civil liability or be damaging to the subjects' financial standing, employability, or reputation.
  - (3) Research involving the use of educational tests (cognitive, diagnostic, aptitude, achievement), survey procedures, interview procedures, or observation of public behavior that is not exempt under paragraph (b)(2) of this section, if:
    - (i) the human subjects are elected or appointed public officials or candidates for public office; or (ii) federal statute(s) require(s) without exception that the confidentiality of the personally identifiable information will be maintained throughout the research and thereafter.
  - (4) Research involving the collection or study of existing data, documents, records, pathological specimens, or diagnostic specimens, if these sources are publicly available or if the information is recorded by the investigator in such a manner that subjects cannot be identified, directly or through identifiers linked to the subjects.
  - (5) Research and demonstration projects which are conducted by or subject to the approval of department or agency heads, and which are designed to study, evaluate, or otherwise examine:
    - (i) Public benefit or service programs; (ii) procedures for obtaining benefits or services under those programs; (iii) possible changes in or alternatives to those programs or procedures; or (iv) possible changes in methods or levels of payment for benefits or services under those programs.
  - (6) Taste and food quality evaluation and consumer acceptance studies, (i) if wholesome foods without additives are consumed; or (ii) if a food is consumed that contains a food ingredient at or below the level and for a use found to be safe, or agricultural chemical or environmental contaminant at or below the level found to be safe, by the Food and Drug Administration or approved by the Environmental Protection Agency or the Food Safety and Inspection Service of the U.S. Department of Agriculture.
- (c) Department or agency heads retain final judgment as to whether a particular activity is covered by this policy.

(d) Department or agency heads may require that specific research activities or classes of research activities conducted, supported, or otherwise subject to regulation by the department or agency but not otherwise covered by this policy, comply with some or all of the requirements of this policy.

(e) Compliance with this policy requires compliance with pertinent federal laws or regulations which provide additional protections for human subjects.

(f) This policy does not affect any state or local laws or regulations which may otherwise be applicable and which provide additional protections for human subjects.

(g) This policy does not affect any foreign laws or regulations which may otherwise be applicable and which provide additional protections to human subjects of research.

(h) When research covered by this policy takes place in foreign countries, procedures normally followed in the foreign countries to protect human subjects may differ from those set forth in this policy. [An example is a foreign institution which complies with guidelines consistent with the World Medical Assembly Declaration (Declaration of Helsinki amended 1989) issued either by sovereign states or by an organization whose function for the protection of human research subjects is internationally recognized.] In these circumstances, if a department or agency head determines that the procedures prescribed by the institution afford protections that are at least equivalent to those provided in this policy, the department or agency head may approve the substitution of the foreign procedures in lieu of the procedural requirements provided in this policy. Except when otherwise required by statute, Executive Order, or the department or agency head, notices of these actions as they occur will be published in the FEDERAL REGISTER or will be otherwise published as provided in department or agency procedures.

(i) Unless otherwise required by law, department or agency heads may waive the applicability of some or all of the provisions of this policy to specific research activities or classes of research activities otherwise covered by this policy. Except when otherwise required by statute or Executive Order, the department or agency head shall forward advance notices of these actions to the Office for Human Research Protections, Department of Health and Human Services (HHS), or any successor office, and shall also publish them in the FEDERAL REGISTER or in such other manner as provided in department or agency procedures.<sup>1</sup>

---

<sup>1</sup>Institutions with HHS-approved assurances on file will abide by provisions of Title 45 CFR part 46 subparts A-D. Some of the other departments and agencies have incorporated all provisions of Title 45 CFR part 46 into their policies and procedures as well. However, the exemptions at 45 CFR 46.101(b) do not apply to research involving prisoners, subpart C. The exemption at 45 CFR 46.101(b)(2), for research involving survey or interview procedures or observation of public behavior, does not apply to research with children, subpart D, except for research involving observations of public behavior when the investigator(s) do not participate in the activities being observed.

## 6. Sample Photographic Release

*(We provide this as a sample to you—develop a release using this format on agency letterhead and take it to an attorney prior to use.)*

The Geta Grant agency is asking your permission to photograph, video, or audio record you and/or your children. We will use the photos, videos, or sound recordings in our brochures, newsletters, annual reports, or other printed or audio materials that we develop to advertise our services, report to our donors and community, and report to our funders. The agency may place these images in publications that we sell. **You (or your children) will receive no financial or program advantage by agreeing to participate in the photographs, videos, or audio recordings.**

We need your permission to use any photo, movie, or voice recording. When you sign below, you give us your permission.

\_\_\_\_\_  
Name

\_\_\_\_\_  
Date

\_\_\_\_\_  
Address

\_\_\_\_\_  
City and Zip

\_\_\_\_\_  
Phone

\_\_\_\_\_  
Email

\_\_\_\_\_  
Name of Minor Child

\_\_\_\_\_  
Your Permission (Sign here again)

\_\_\_\_\_  
Name of Minor Child

\_\_\_\_\_  
Your Permission (Sign here again)

\_\_\_\_\_  
Name of Minor Child

\_\_\_\_\_  
Your Permission (Sign here again)

## 7. Line-Item Budget Worksheet

| <b>Personnel</b>               | <b>FTE</b> | <b>Monthly Range (FTE)</b> | <b>Monthly</b> | <b>Yearly</b> |
|--------------------------------|------------|----------------------------|----------------|---------------|
| Executive Director             |            |                            |                |               |
| Project Director               |            |                            |                |               |
| Educator                       |            |                            |                |               |
| Therapist                      |            |                            |                |               |
| Admin Assistant                |            |                            |                |               |
| Subtotal Personnel             |            |                            |                |               |
| Benefits @ ___%                |            |                            |                |               |
| Total Personnel                |            |                            |                |               |
| <b>Operating Expenses</b>      |            |                            |                |               |
| Communications                 |            |                            |                |               |
| Rent (___s.f. x _____per s.f.) |            |                            |                |               |
| Office Supplies                |            |                            |                |               |
| Printing                       |            |                            |                |               |
| Program Materials              |            |                            |                |               |
| Furniture/Fixtures             |            |                            |                |               |
| Equipment Purchase (computer)  |            |                            |                |               |
| Equipment Rental (copier)      |            |                            |                |               |
| Program Liability Insurance    |            |                            |                |               |
| Conference                     |            |                            |                |               |
| Mileage at _____               |            |                            |                |               |
| Subtotal Operating             |            |                            |                |               |
| Indirect at ___% Total Budget  |            |                            |                |               |
| Grand Total                    |            |                            |                |               |
